# Supplementary material
Source: publisher figshare collection journal article supplement (https://frontiersin.figshare.com/ndownloader/files/20322255)

## PART I

The figures below show the relationship between “true” score and error variance after truncation and rounding have taken place, for the four relationships depicted in Figure 5 and varying numbers of items and sizes for  $K$ .

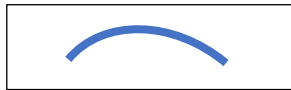

Relationship 1

### 12 items

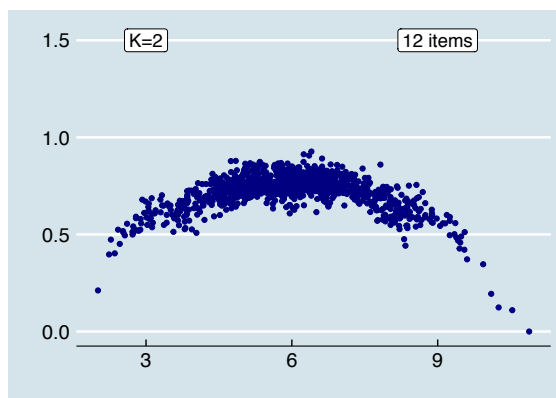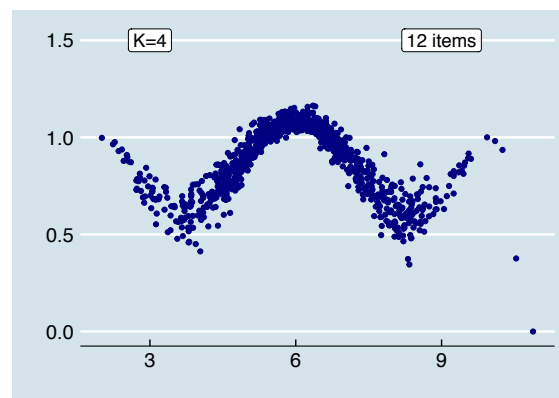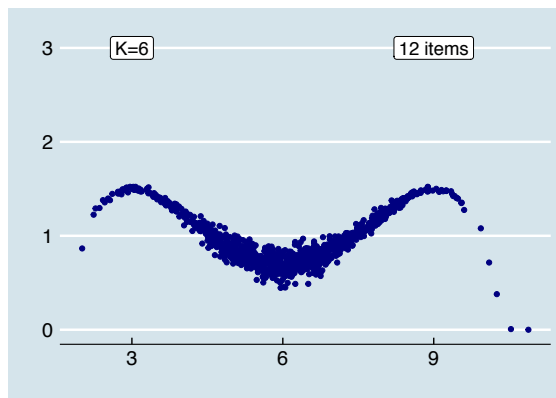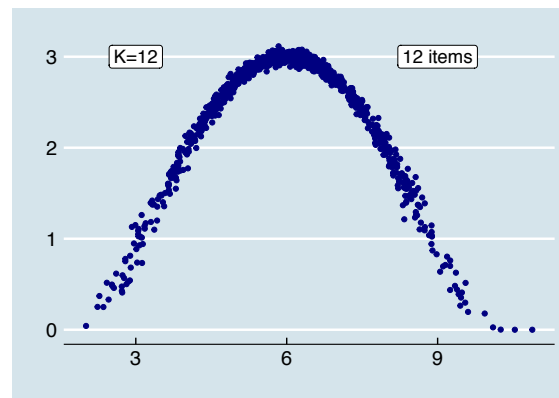

## 24 items

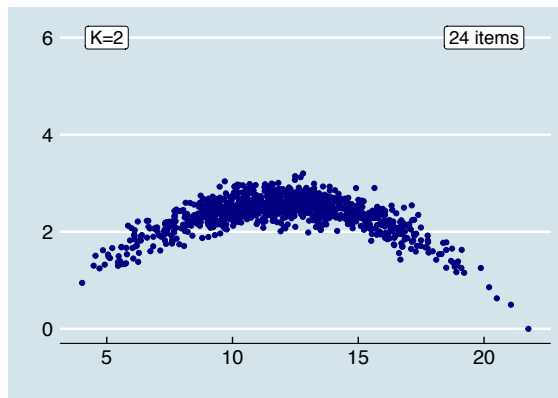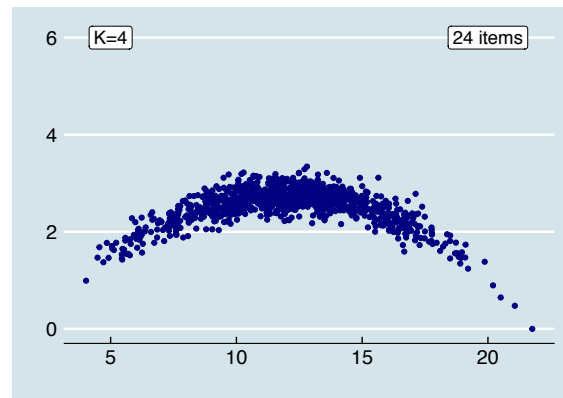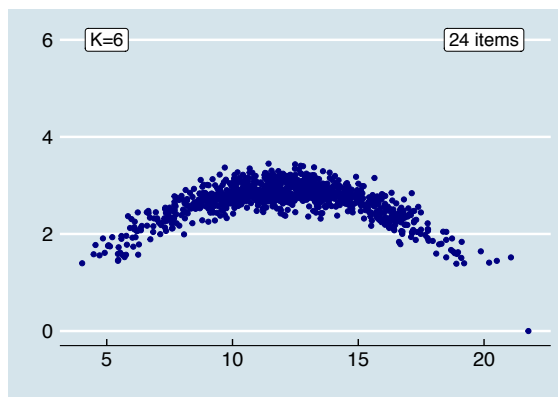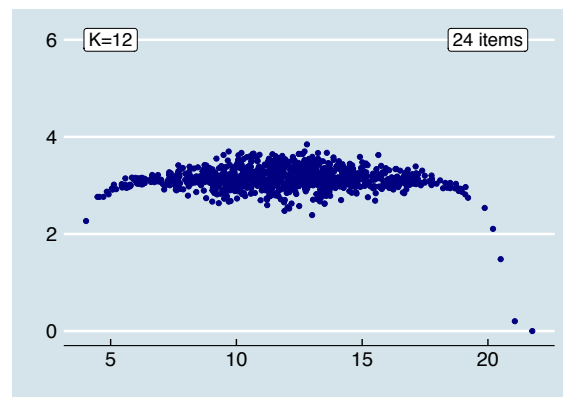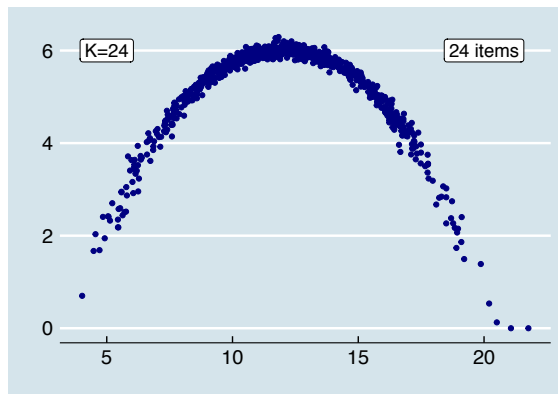

## 48 items

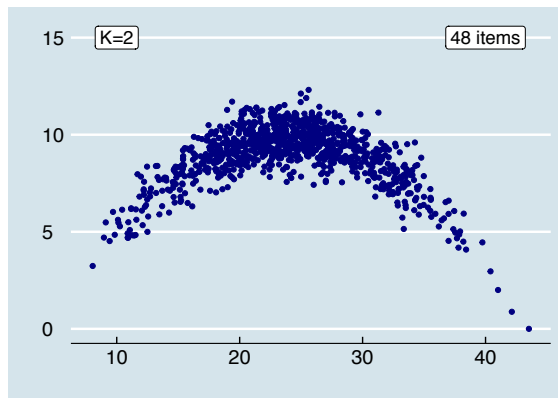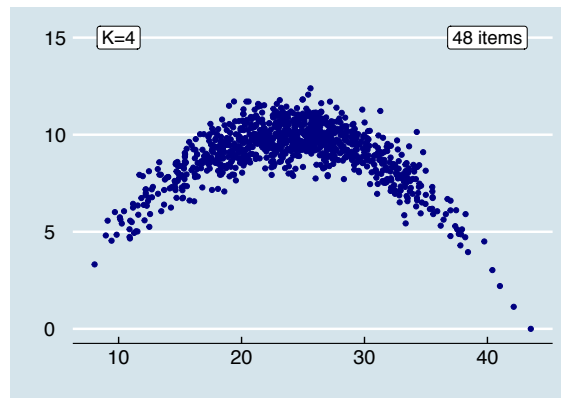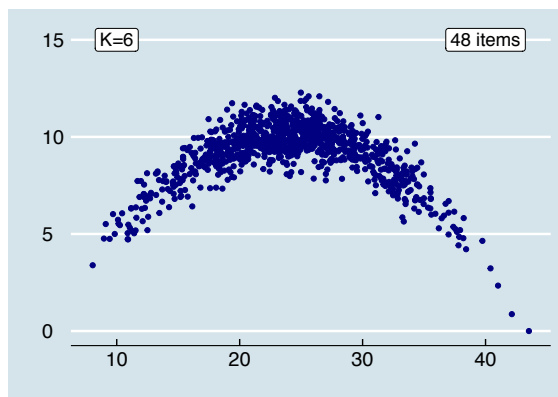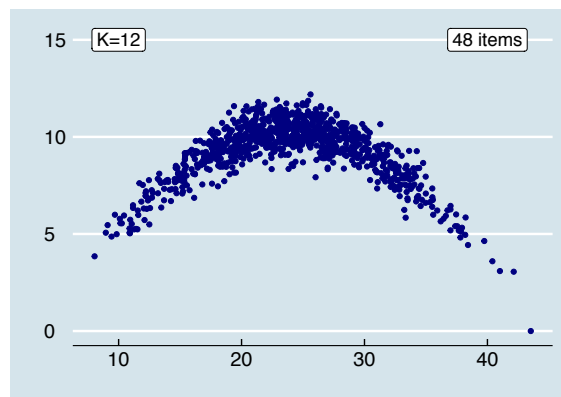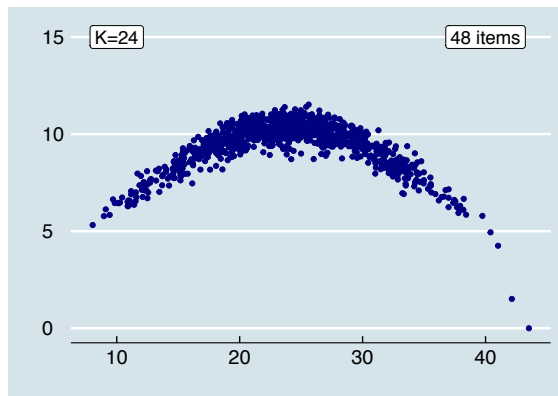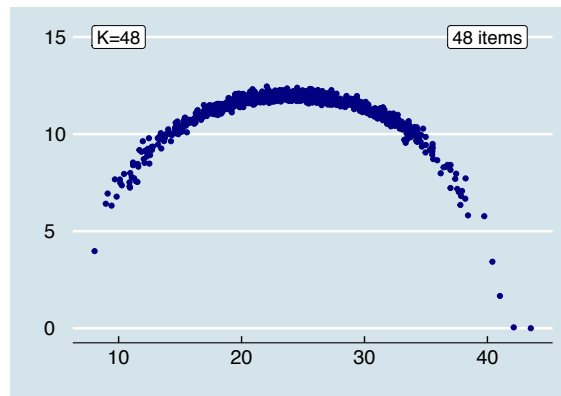

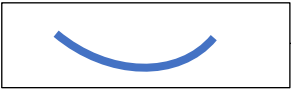

Relationship 2

12 items

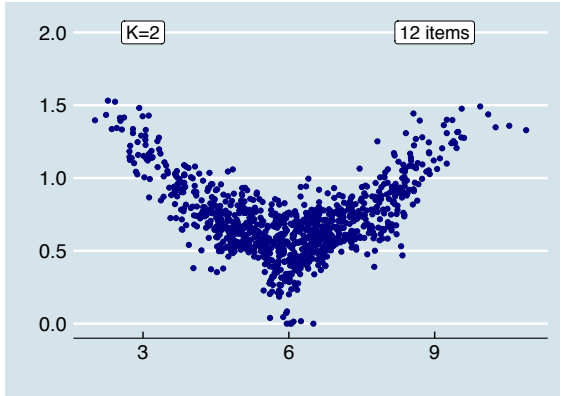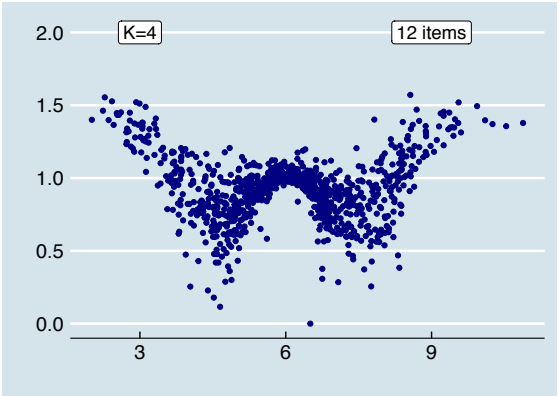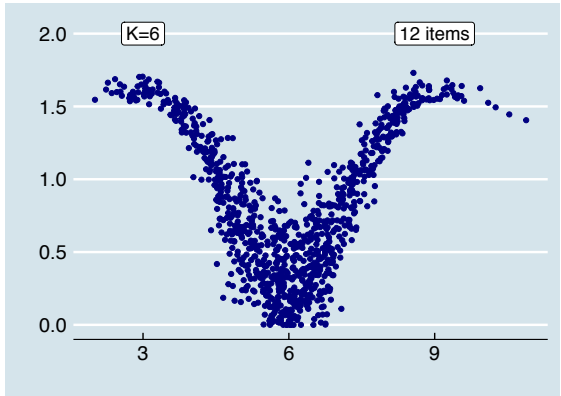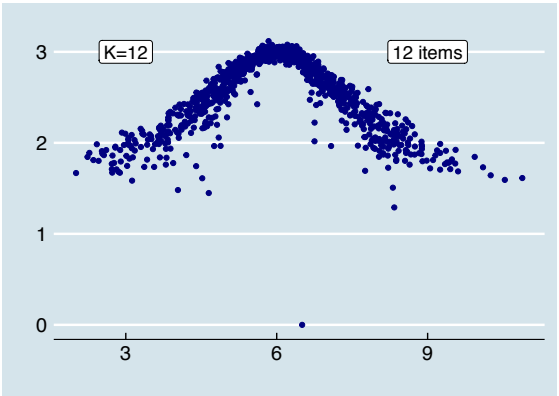

## 24 items

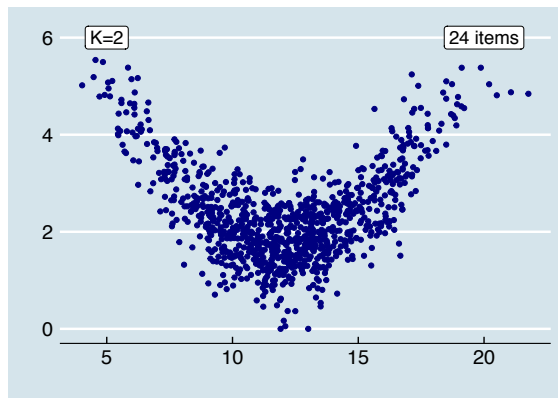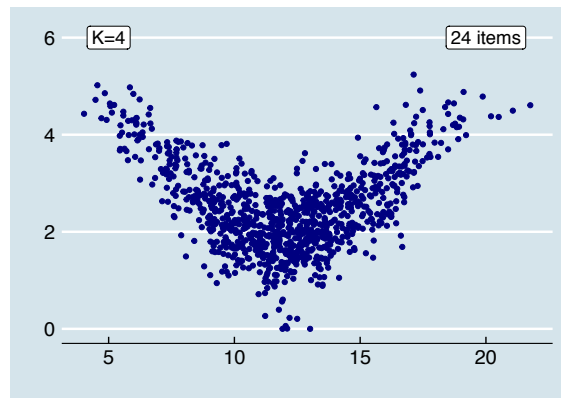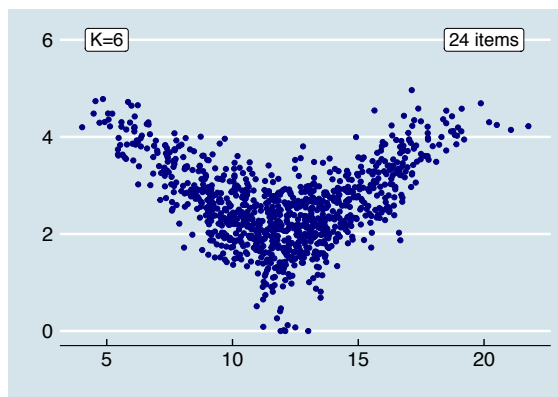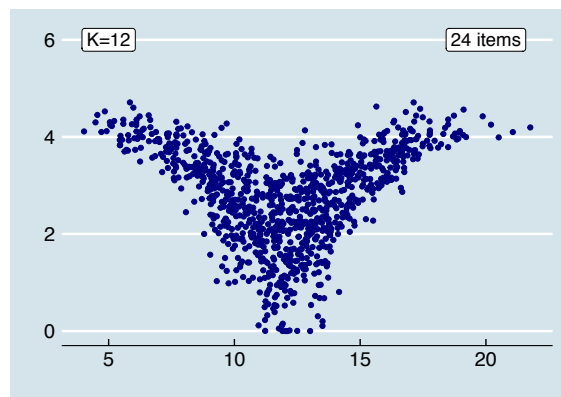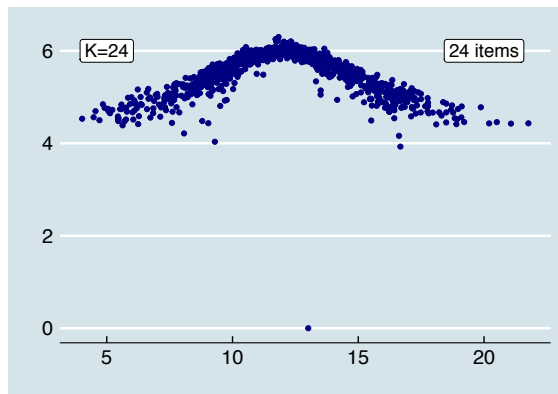

## 48 items

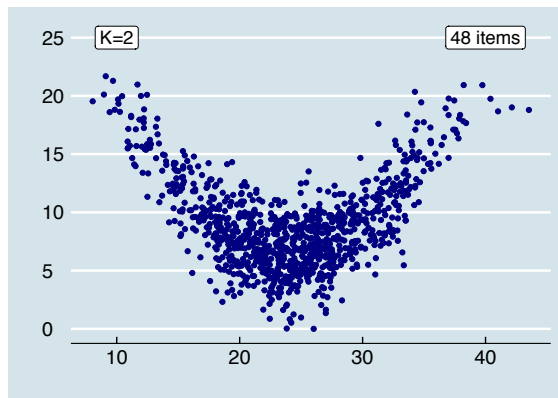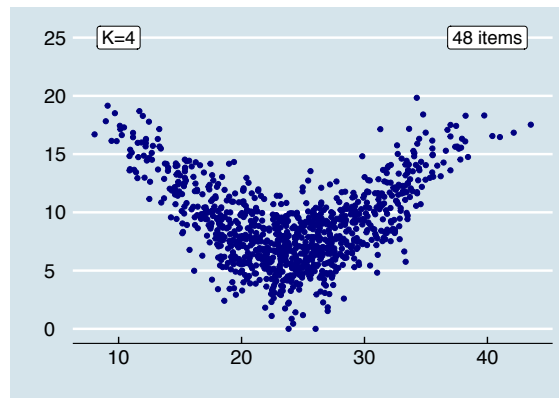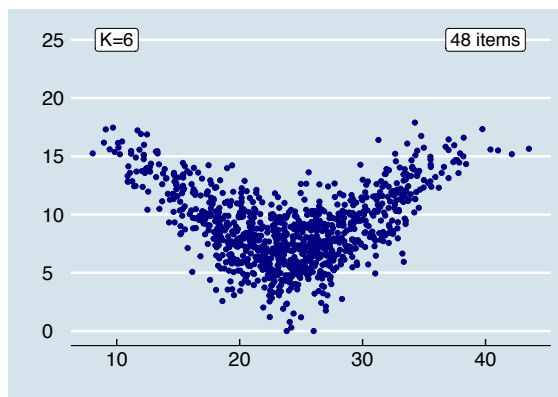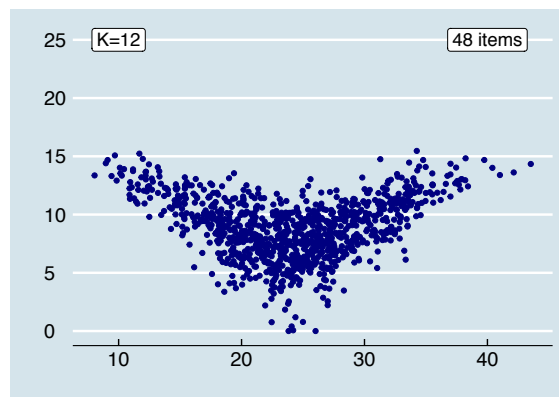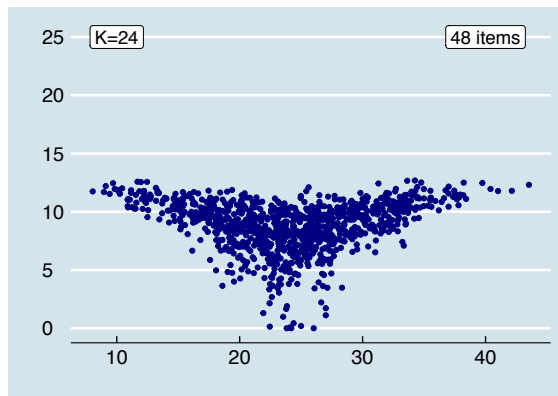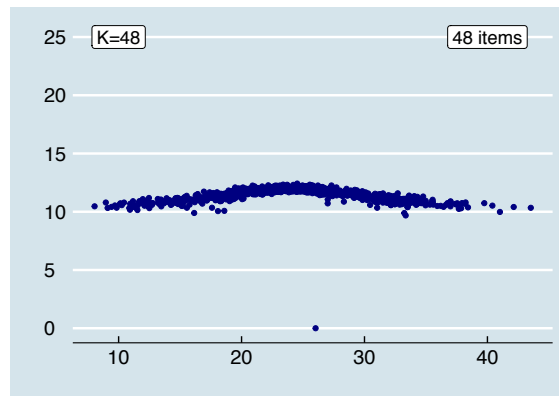

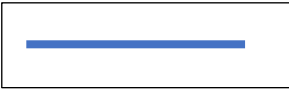

12 items

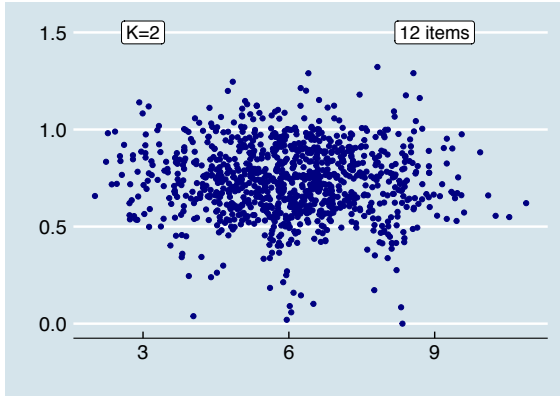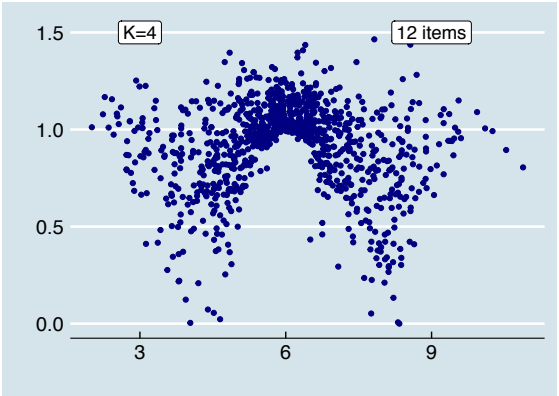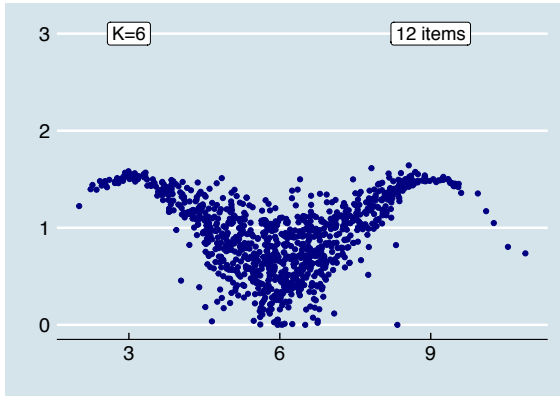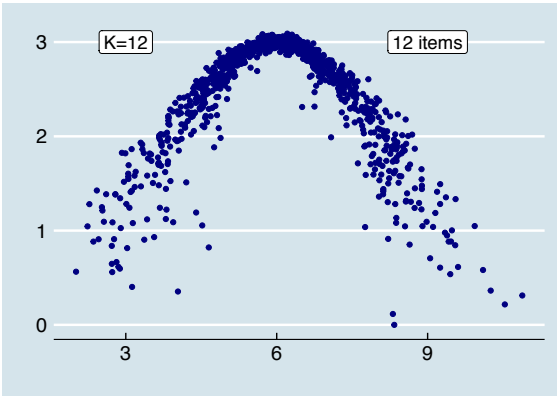

## 24 items

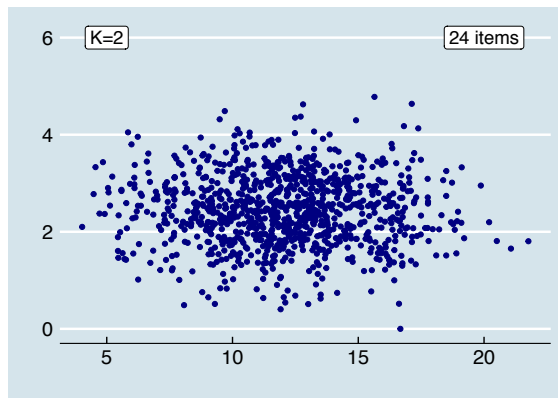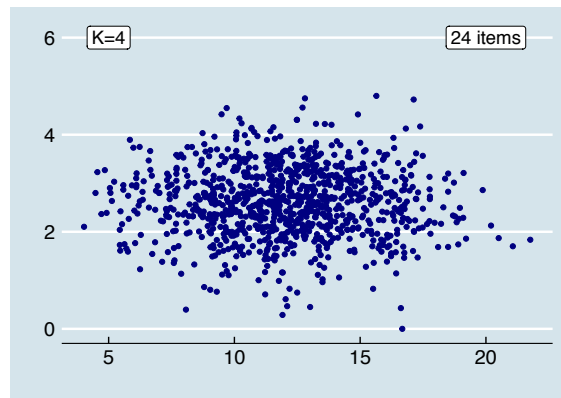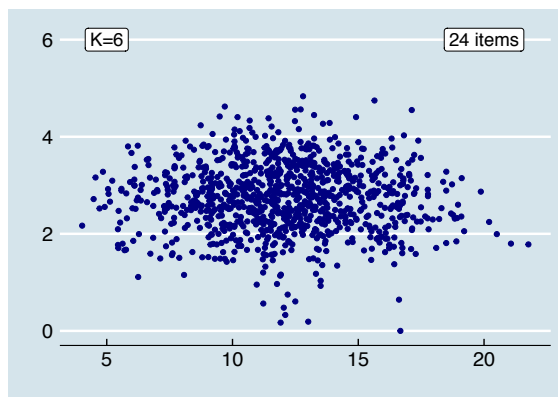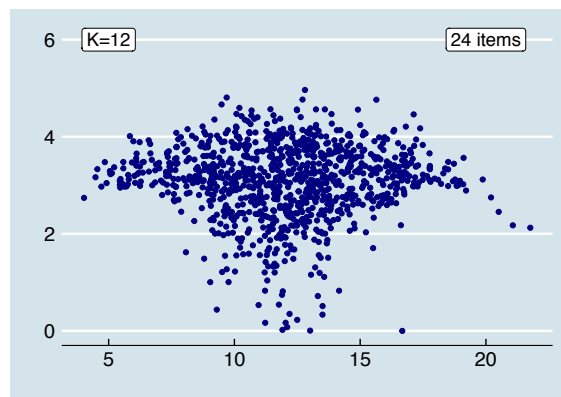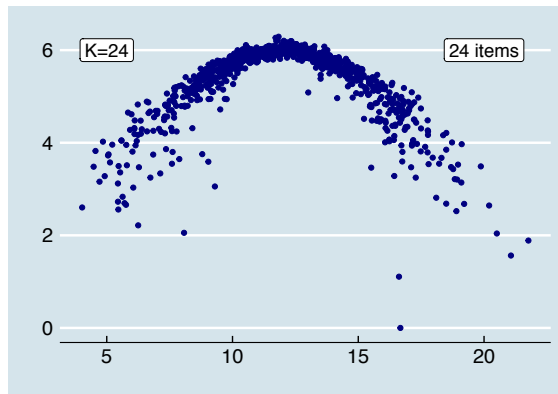

## 48 items

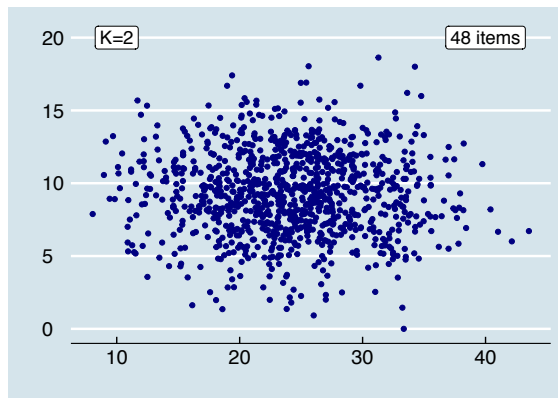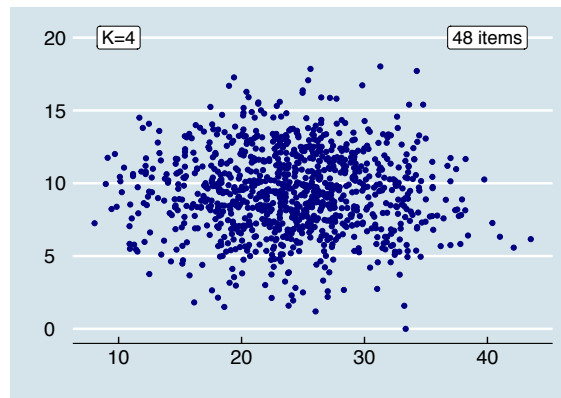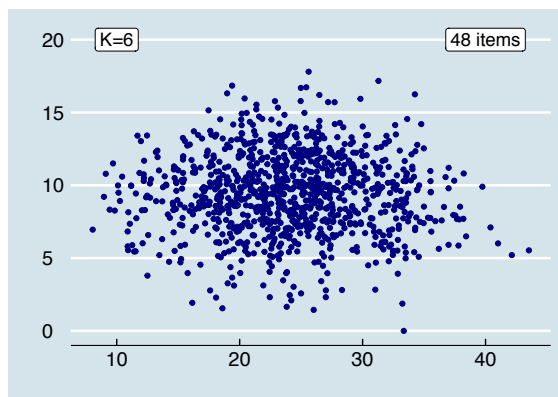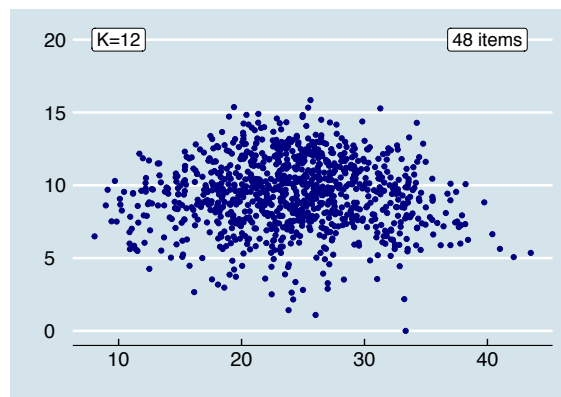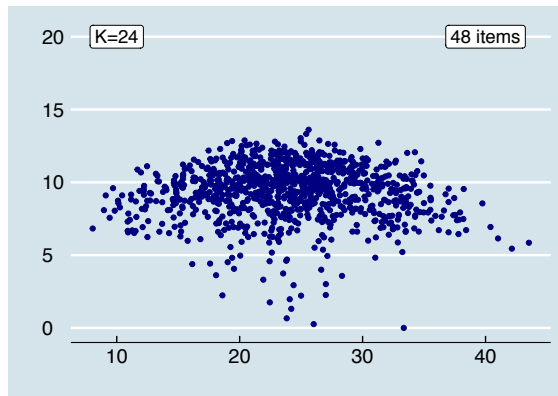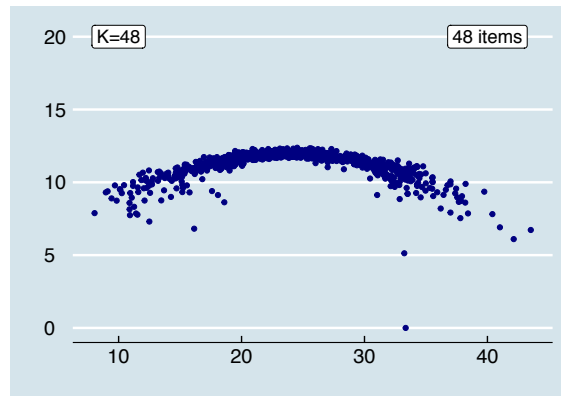

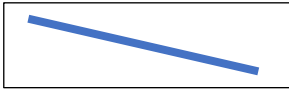

Relationship 4

## 12 items

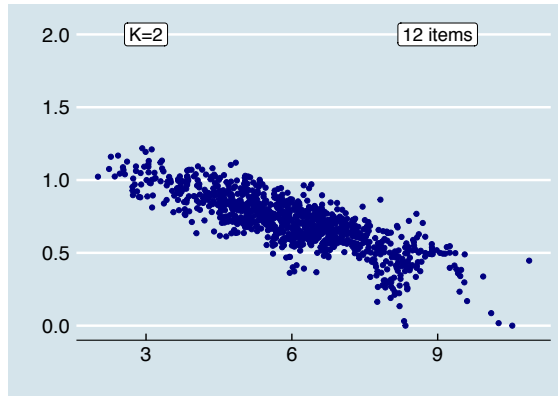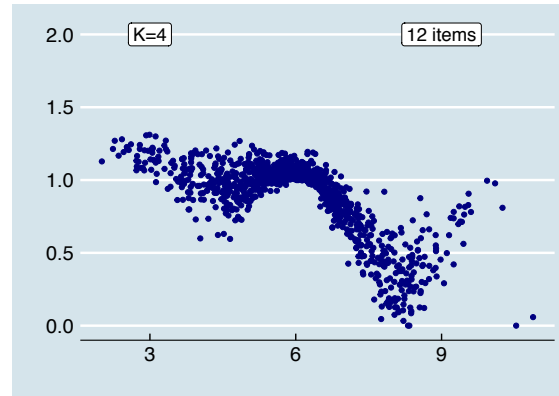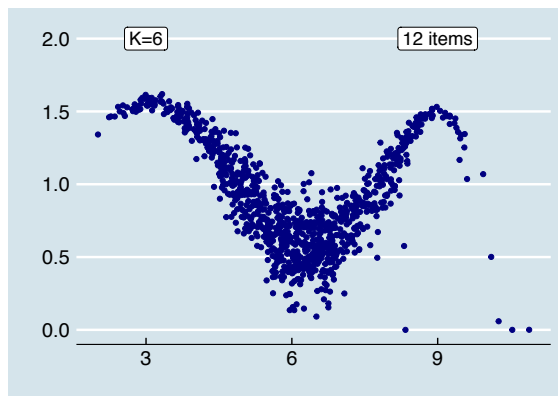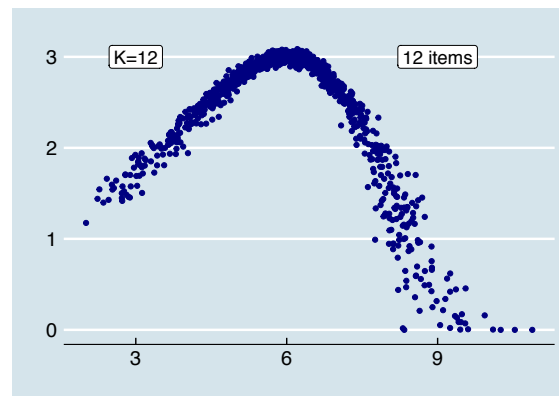

## 24 items

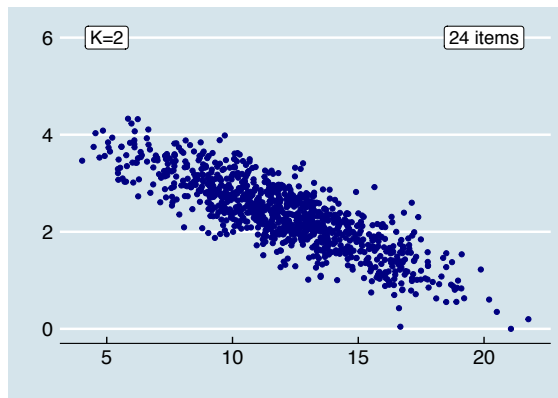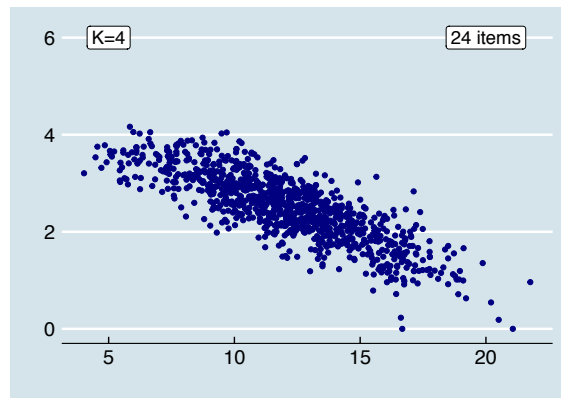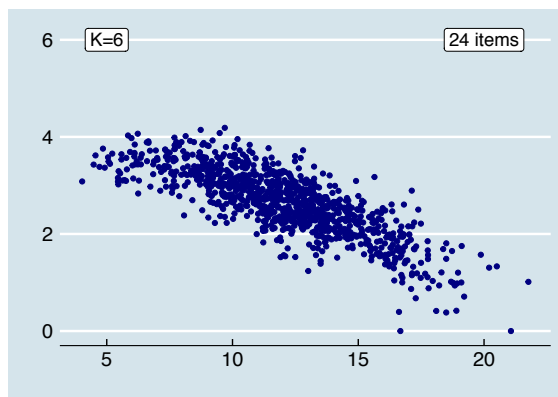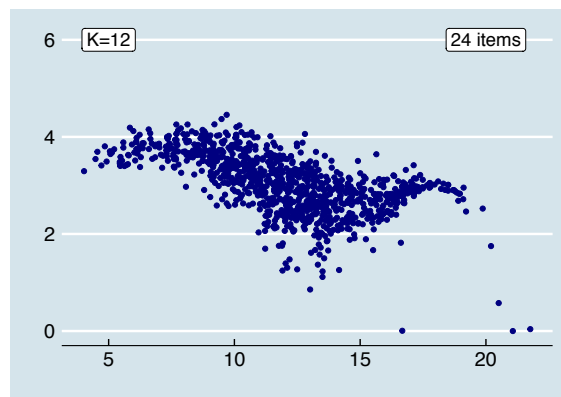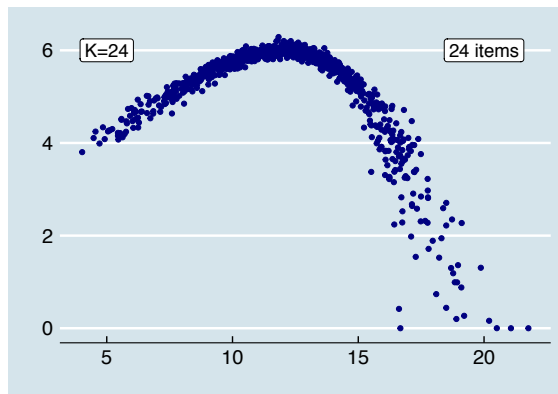

## 48 items

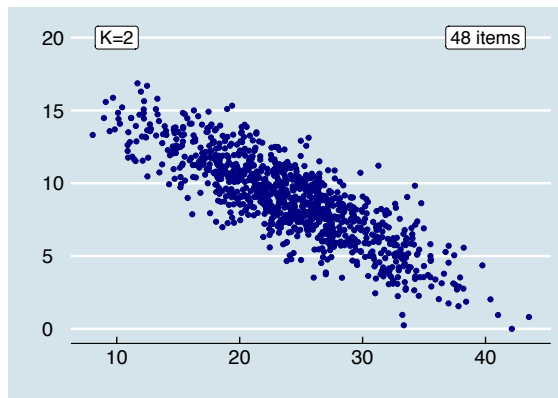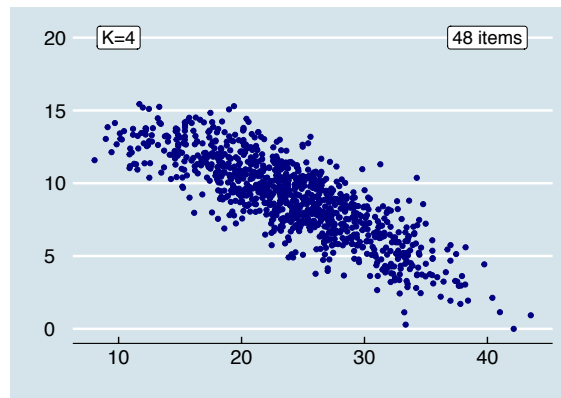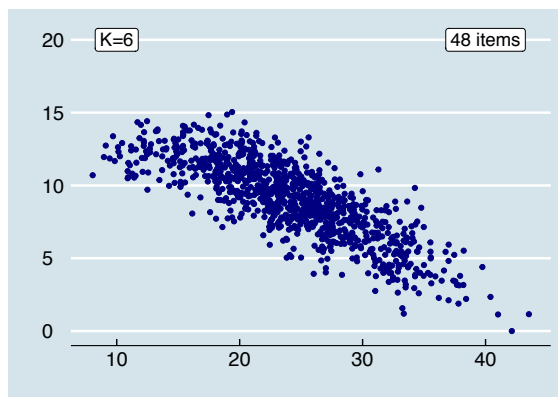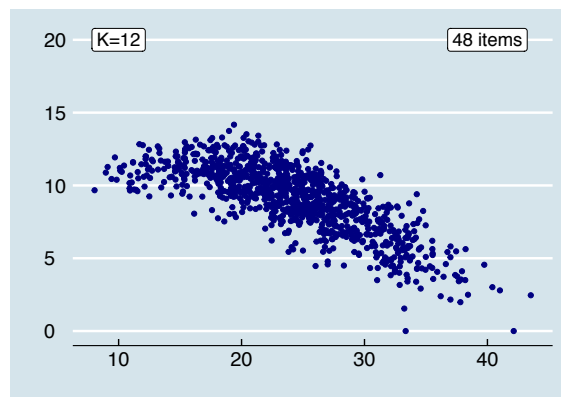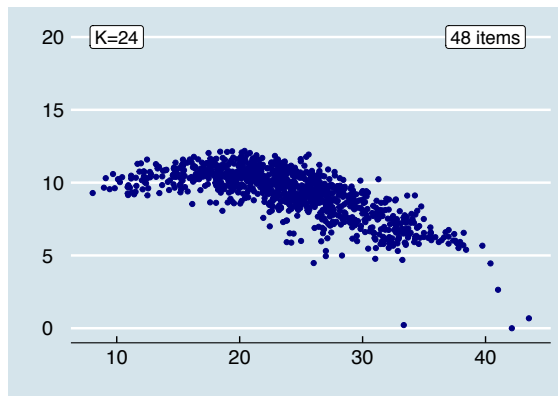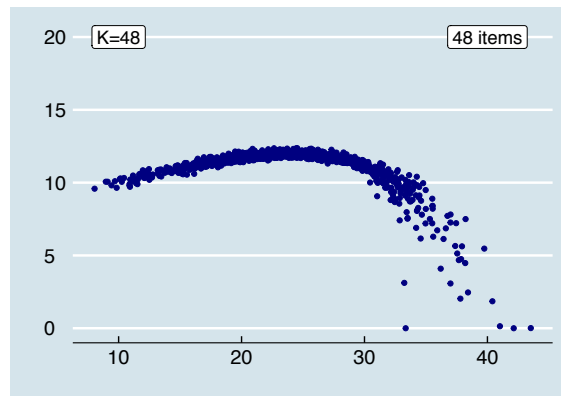

Supplement: Supplementary file 1 [file 20322255]
